# Supplementary material for: SLC13A5 novel compound-heterozygous variant underlies Developmental and Epileptic Encephalopathy-25 in a Chinese newborn: Case report and Literature Review
Source: Research Square preprint supplement (doi:10.21203/rs.3.rs-7452007/v1), 2025-11-05
Supplement: Supplementary file 1 [file 323f4ab40bcbe634952801f4.xlsx]

## Sheet: Sheet1
NO.	Reference	Gender	Age of onset	c.DNA change	Amino acid change	Mutation Type	Zygozity	Seizure type at one set	Global Developmental delay(GDD)	Motor delay	Teeth hypoplasia	MRI	EEG	AEDs(antiepileptic drugs)
1	This Study	F	8th day	c.1059_1062delinsA, c.643G＞A	p.Tyr353_Val354delinsTer, p.Ala215Thr	Frameshift, indel, missense	compound heterozygous	Focal clonic seizures	NR	NR	NR	Normal MRI	EEG: a focal attack and burst-suppression	DZP, PB, LEV, MDZ, PIN, TPM
2	Thevenon J, The American Journal of Human Genetics. 2014;95(1):113-120.	M	1st day	c.680C>T, c.655G>A	p.Thr227Met, p.Gly219Arg	missense	compound heterozygous	Focal seizure	NR	(+)	NR	Normal MRI	First EEG :Permanent bi-occipital status epilepticus (first week) Bilateral and alternative epileptic focus with dominant activity in right temporal lobe	multiple AEDs
3	Thevenon J, The American Journal of Human Genetics. 2014;95(1):113-120.	M	5th day	c.680C>T, c.655G>A	p.Thr227Met, p.Gly220Arg	missense	compound heterozygous	Multifocal seizures	NR	(+)	(-)	Normal MRI	First EEG:Rhythmic theta/delta focal discharge originating from one or other part of the brain, mostly in the left and right temporal regions, alternatively	NR
4	Thevenon J, The American Journal of Human Genetics. 2014;95(1):113-120.	M	1st day	NR	NR	NR	NR	Multifocal seizures	NR	(+)	NR	Normal MRI	First EEG:Continuous sequences of focal seizures involving temporal and occipital regions of both hemispheres alternatively, mostly the left one, with rhythmic, large amplitude spikes lasting several minutes. There was no suppression- burst.	3AEDs
5	Thevenon J, The American Journal of Human Genetics. 2014;95(1):113-120.	M	1st day	NR	NR	NR	NR	NR	NR	(+)	NR	Normal MRI	NR	NR
6	Thevenon J, The American Journal of Human Genetics. 2014;95(1):113-120.	M	1st day	c.1463T>C	p.Leu488Pro	missense	homozygous	status epilepticus	NR	(+)	NR	Normal MRI	First EEG:Predominantly central, bilateral and multifocal generalized epileptic focus	NR
7	Thevenon J, The American Journal of Human Genetics. 2014;95(1):113-120.	M	1st week	NR	NR	NR	NR	NR	NR	(+)	NR	Normal MRI	NR	NR
8	Thevenon J, The American Journal of Human Genetics. 2014;95(1):113-120.	M	1st day	NR	NR	NR	NR	NR	NR	(+)	NR	Normal MRI	NR	NR
9	Thevenon J, The American Journal of Human Genetics. 2014;95(1):113-120.	M	1st day	c.680C>T, c655G>A	p.Thr227Met	NR	compound heterozygous	Focal seizure	NR	(+)	NR	Normal MRI	NR	NR
10	Hardies K, Brain. 2015;138(11):3238-3250.	M	1st day	c.1280C>T	p.Ser427Leu	Missense	homozygous	status epilepticus, Focal seizure	(+)	(+)	(+)	multiple punctuate haemorrhages white matter compatible with periventricular leukomalacia	EEG(one set):Initially normal, then disontinuous with multifocal epileptiform discharges temporo-occipital regions	PB, PIN, LIDO, VGB, VPA, TPM, PHT, LEV, CBZ, OXC, VNS, KD, MDZ
11	Hardies K, Brain. 2015;138(11):3238-3250.	M	1st day	c.1280C>T	p.Ser427Leu	Missense	homozygous	status epilepticus, Focal seizure	(+)	(+)	(+)	Periventricular leukomalacia(PVL)	EEG(one set):Epileptic discharges over bilateral central regions	Na
12	Hardies K, Brain. 2015;138(11):3238-3250.	M	1st day	c.1207_1217dup11. c.1022G>A	p.Pro407Argfs*12.p.Trp341*	Frameshift, Nonsense	Compound heterozygous	status epilepticus, generalized convulsive	(+)	(+)	(+)	Normal MRI	EEG:Initially normal, then focal right centro-occipital spikes and spike waves. Ictal generalized polyspikes and spike waves during myoclonic sz	PHT, PB, VPA, OXC, TPM
13	Hardies K, Brain. 2015;138(11):3238-3250.	F	1st day	c.1207_1217dup11. c.1022G>A	p.Pro407Argfs*12.p.Trp341*	Frameshift, Nonsense	Compound heterozygous	status epilepticus, generalized convulsive	NR	NR	(+)	Normal MRI	Mild right hemiparesis. Choreoathetosis；EEG:Focal spike waves left centro_x0002_occipital	PB, VPA, PHT, OXC
14	Hardies K, Brain. 2015;138(11):3238-3250.	F	1st day	c.425C>T c.655G>A	p.Thr142Met p.Gly219Arg	missense	Compound heterozygous	Focal clonic seizure	NR	NR	(+)	Normal MRI	EEG:Normal interictal EEG	PB, VPA, VGB
15	Hardies K, Brain. 2015;138(11):3238-3250.	F	1st day	c.425C>T c.655G>A	p.Thr142Met p.Gly219Arg	missense	Compound heterozygous	status epilepticus, generalized convulsive	NR	NR	(+)	Normal MRI	EEG:Multifocal spike waves	PB, STM, AA, VGB, CBZ, OXC, LEV, ESM, DZP, KD
16	Hardies K, Brain. 2015;138(11):3238-3250.	M	1st day	c.425C>T c.655G>A	p.Thr142Met p.Gly219Arg	missense	Compound heterozygous	status epilepticus, focal clonic seizures	NR	NR	(+)	Normal MRI	EEG:Multifocal spike waves	PB, STM, AA, VGB, OXC, LEV, KD
17	Hardies K, Brain. 2015;138(11):3238-3250.	F	1st day	c.680C>T, c.1570G>C	p.Thr227Met, p.Asp524His	missense	Compound heterozygous	status epilepticus, focal clonic seizures	(+)	(+)	(+)	Normal MRI	EEG:Multifocal sharp slow waves	PB, VPA, LEV
18	Alazami (2015) Cell Rep 10, 148	NR	NR	c.231+2T>G		Splice Site	homozygous	NR	(+)	NR	NR	NR	NR	NR
19	Klotz (2016) Mol Med 22, epub	F	1st week	c.655 G > A, c.1475 T > C	p.Gly219Arg, p.Leu492Pro	Missense	Compound heterozygous	Complex partial GTC（generalized tonic clonic） Myoclonic	(+)	(+)	(+)	Normal MRI	NR	AA, CBZ, PB, PHT
20	Klotz (2016) Mol Med 22, epub	M	1st week	c.655 G > A, c.1475 T > C	p.Gly219Arg, p.Leu492Pro	Missense	Compound heterozygous	Atonic hemiplegia	(-)	(+)	(+)	Normal MRI	NR	AA, PB
21	Klotz (2016) Mol Med 22, epub	F	1st week	c.680 C > T	p.Thr227Met	Missense	homozygous	Complex partial Focal motor Myoclonic	(+)	(+)	(+)	Normal MRI	NR	DZP, LTG, PB, PHT
22	Klotz (2016) Mol Med 22, epub	F	1st week	c.245 A > G, c.655 G > A	p.Tyr82Cys, p.Gly219Arg	Missense	Compound heterozygous	Complex partial Focal motor Myoclonic	(-)	(+)	(+)	Focal front lobe thickining	NR	CLB, CNZ, LP, MD
23	Klotz (2016) Mol Med 22 epub	M	1st week	c.245 A > G, c.655 G > A	p.Tyr82Cys, p.Gly219Arg	Missense	Compound heterozygous	Focal motor Myoclonic	(-)	(+)	(+)	Normal MRI	NR	CLB, CNZ, LTG
24	Klotz (2016) Mol Med 22, epub	F	1st week	c.511delG	p. E171Sfs*16	frameshift, and premature stop	homozygous	Complex partial GTC	NR	(+)	NR	Normal MRI	NR	AA, PHT
25	Klotz (2016) Mol Med 22, epub	F	＜1y	c.1276-1G > A, c.103-1G > A	Splice site	Affect splice site & add intron**	Compound heterozygous	Absence Complex partial Focal motor GTC Myoclonic	(-)	(+)	(+)	Hyprintense foci in parietal white matter	NR	AA, CNZ, LTG, VPA
26	Klotz (2016) Mol Med 22, epub	M	1st week	c.1276-1G > A, c.103-1G > A	Splice site	Affect splice site & add intron**	Compound heterozygous	Focal motor GTC Myoclonic	(-)	(+)	(+)	Normal MRI	NR	AA, CNZ, LTG, VPA
27	Klotz (2016) Mol Med 22, epub	M	1st week	c.655 G > A	p.Gly219Arg	Missense	homozygous	Absence Atonic Complex partial Focal motor GTC Infantile spasms Myoclonic Tonic	(+)	(+)	NR	Focal loss of grey matter	NR	LTG, OXC, TPM
28	Anselm (2016) JIMD Rep 31: 107	M	1st day	c.245A>G, c.655G>A	p.Tyr82Cys, p.Gly219Arg	Missense	compound heterozygotes	clonic seizures	(+)	(+)	NR	Delayed Mylination	The most recent EEG shows multifocal sharp waves,	PB
29	Anselm (2016) JIMD Rep 31: 107	F	1st day	c.245A>G, c.655G>A	p.Tyr82Cys, p.Gly219Arg	Missense	compound heterozygotes	Focal seizures	(+)	(+)	NR	focal cortical dysplasia (FCD)	Her most recent EEG demonstrates near continuous sharp waves in the right frontal area and continuous generalized slowing	multiple AEDs, KD
30	Weeke (2016) Eur J Paediatr Neurol 21: 396	F	1st day	c.655G>A, c.1280C>T	p.Gly219Arg, p.Ser427Leu	Missense	compound heterozygotes	Status epilepticus: tonic clonic,	NR	(+)	(+)	Punctate White Matter Lesions(PWML)	EEG background activity：DNV recovering to CNV +SWC at day3（CNV:continuous normal voltage；SWC: sleep-wake cycling）	PB, MDZ, LIDO, CLB
31	Weeke (2016) Eur J Paediatr Neurol 21: 396	M	1st day	c.655G>A, c.1280C>T	p.Gly219Arg, p.Ser427Leu	Missense	compound heterozygotes	Repetitive seizures: clonic,	NR	NR	NR	suspected PWML	EEG background activity:DNV recovering to CNV +SWC at day3 (DNV:discontinuous normal voltage)	PB, PIN, MDZ, LIDO
32	Weeke (2016) Eur J Paediatr Neurol 21: 396	M	1st day	c.1280C>T	p.Ser427Leu	Missense	homozygous	Status epilepticus: focal clonic seizures	NR	(+)	(+)	PWML	EEG background activity:DNV recovering to CNV +SWC at day7	PB, PIN, MDZ
33	Weeke (2016) Eur J Paediatr Neurol 21: 396	M	1st day	c.1280C>T	p.Ser427Leu	Missense	homozygous	Status epilepticus: focal clonic seizures	NR	(+)	(+)	NR	NR	NR
34	Weeke (2016) Eur J Paediatr Neurol 21: 396	M	1st day	c.680C>T, c.1280C>T	p.Thr227Met, p.Ser427Leu	Missense	Compound heterozygous	Status epilepticus:clonic, lip smacking	NR	NR	NR	PWML	EEG background activity:DNV recovering to CNV +SWC at day3	PB, LIDO
35	Weeke (2016) Eur J Paediatr Neurol 21: 396	F	1st day	c.655G>A	p.Gly219Arg	Missense	Homozygous	Status epilepticus: focal clonic seizures	NR	NR	NR	PWML	EEG background activity:DNV recovering to CNV +SWC at day5	PB, MD, LD, LEV, PT, PTH
36	Weeke (2016) Eur J Paediatr Neurol 21: 396	F	2nd day	c.655G>A	p.Gly219Arg	Missense	Homozygous	Status epilepticus: focal clonic seizures	NR	NR	NR	PWML	EEG background activity:DNV recovering to CNV +SWC at day3	PB, MD, LD, LEV, PT
37	Weeke (2016) Eur J Paediatr Neurol 21: 396	F	1st day	c.680C>T, c.1570G>C	p.Thr227Met, p.Asp524His	Missense	Compound heterozygous	Clonic focal	NR	(+)	(+)	PWML	EEG: spike-waves on discontinuous EEG at day 7	PB
38	Nolan (2016) J Child Neurol 31, 887	F	NR	NR	p.E17SfsX15	Frameshift	NR	NR	NR	NR	NR	NR	NR	NR
39	Nolan (2016) J Child Neurol 31, 887	M	NR	NR	p.E17SfsX15	Frameshift	NR	NR	NR	NR	NR	NR	NR	NR
40	Schossig A, J Med Genet. 2016;54(1):54-62.	M	1st day	c.997C>T	p.Arg333*	nonsense	Homozygous	NR	（+）	NR	(+)	Normal MRI	EEG :epileptiform potentials with different foci,	NR
41	Schossig A, J Med Genet. 2016;54(1):54-62.	F	7m	c.997C>T	p.Arg333*	nonsense	Homozygous	NR	（+）	(+)	(+)	Normal MRI	EEGs showed different patterns starting with multifocal epileptiform potentials at the age of 7 months, monomorphic theta rhythms at the age of 2½ and later on generalised spike wave activity	NR
42	Schossig A, J Med Genet. 2016;54(1):54-62.	F	1st day	c.203C>A, c.434C>A	p.Pro68Gln p.Thr145Lys	Missense	Compound heterozygous	tonic–clonic	（+）	NR	(+)	Normal MRI	NR	NR
43	Schossig A, J Med Genet. 2016;54(1):54-62.	F	2m	c.203C>A, c.434C>A	p.Pro68Gln p.Thr145Lys	Missense	Compound heterozygous	focal clonic	（+）	NR	(+)	Normal MRI	EEG:Normal interictal EEG	NR
44	Schossig A, J Med Genet. 2016;54(1):54-62.	F	1.5m	c.103-1G>A, c.1276-1G>A		splice site	Compound heterozygous	NR	（+）	NR	(+)	Normal MRI	NR	NR
45	Schossig A, J Med Genet. 2016;54(1):54-62.	M	1st day	c.103-1G>A, c.1276-1G>A		splice site	Compound heterozygous	NR	（+）	NR	(+)	Normal MRI	NR	NR
46	Schossig A, J Med Genet. 2016;54(1):54-62.	F	1st day	c.425C>T, c.655G>A	p.Thr142Met p.Gly219Arg	Missense	Compound heterozygous	NR	（+）	NR	(+)	Normal MRI	EEG:Normal interictal EEG	PB, VPA, VGB
47	Schossig A, J Med Genet. 2016;54(1):54-62.	F	1st day	c.425C>T, c.655G>A	p.Thr142Met p.Gly219Arg	Missense	Compound heterozygous	NR	（+）	NR	(+)	Normal MRI	EEG:Normal interictal EEG	PB, STM, AA, VGB, CBZ, OXC, LEV, ESM, DZP, KD
48	Schossig A, J Med Genet. 2016;54(1):54-62.	M	1st day	c.425C>T, c.655G>A	p.Thr142Met p.Gly219Arg	Missense	Compound heterozygous	NR	（+）	NR	(+)	Normal MRI	EEG:Multifocal spike waves	PB, STM, AA, VGB, OXC, LEV, KD
49	Schossig A, J Med Genet. 2016;54(1):54-62.	F	1st day	c.680C>T	p.Thr227Met	Missense	homozygous	partial seizures and complex partial seizures	（+）	NR	(+)	Mild atrophy of left hemisphere	Interictal EEG revealed frequent centro-parietal epileptiform activity with sharp waves, isolated spikes as well as spike waves	NR
50	Eldomery (2017) Genome Med 9: 26	NR	NR	c.1475T>C, c.655G>A	p.L492P, p.Gly219Arg	Missense	Compound heterozygous	NR	NR	NR	NR	NR	NR	NR
51	Eldomery (2017) Genome Med 9: 26	NR	NR	c.997C>T, c.680C>T	p.R333*, p.Thr227Met	Deletion, Missense	Compound heterozygous	NR	NR	NR	NR	NR	NR	NR
52	Alfares (2017) Mol Genet Metab 121, 91	NR	NR	c.785T>C	p.Leu262Pro	NR	Homozygous	NR	(+)	(+)	NR	NR	NR	NR
53	Harripaul (2017) Mol Psychiatry 23, 973	NR	NR	c.254A>G	p.Asp85Gly	Missense	NR	NR	NR	NR	NR	NR	NR	NR
54	Bainbridge M, Mol Genet Metab. 2017;121(4):314-319.	F	1st day	c.655G>A, c1475T＞C	p.Leu492Pro, p.Gly219Arg	missense	Compound heterozygous	status epilepticus, intractable seizures	(+)	(+)	NR	Normal MRI	NR	multiple AEDs, KD
55	Bainbridge M, Mol Genet Metab. 2017;121(4):314-319.	M	1st day	c.655G>A, c1475T＞C	p.Leu492Pro, p.Gly219Arg	missense	Compound heterozygous	intractable seizures	(+)	(+)	NR	Normal MRI	NR	multiple AEDs
56	Bainbridge M, Mol Genet Metab. 2017;121(4):314-319.	M	1st day	c.680C＞T, c.997C＞T	p.Tyr227Met, p.Arg333*	Missense/nonsense	compound heterozygous	intractable seizures	(+)	(+)	NR	NR	NR	multiple AEDs
57	Bainbridge M, Mol Genet Metab. 2017;121(4):314-319.	F	3rd day	c.511delG	p.E1715fs*16	frame shift and premature stop codon	homozygous	intractable seizures	(+)	(+)	NR	NR	NR	multiple AEDs
58	Bainbridge M, Mol Genet Metab. 2017;121(4):314-319.	M	1st day	c.511delG	p.E1715fs*16	frame shift and premature stop codon	homozygous	intractable seizures	(+)	(+)	NR	NR	NR	multiple AEDs, KD
59	Shamseldin (2017) Genet Med 19, 593	NR	NR	c.1227dup	p.Ile410Hisfs*13	frame shift duplication	homozygous	NR	NR	NR	NR	NR	NR	NR
60	Shamseldin (2017) Genet Med 19, 593	NR	NR	c.1227dup	p.Ile410Hisfs*13	frame shift duplication	homozygous	NR	NR	NR	NR	NR	NR	NR
61	Shamseldin (2017) Genet Med 19, 593	NR	NR	c.1227dup	p.Ile410Hisfs*13	frame shift duplication	homozygous	NR	NR	NR	NR	NR	NR	NR
62	Monies (2017) Hum Genet 136: 921	M	NR	c.1098dupC	p.I367fs	frame shift duplication	homozygous	NR	(+)	NR	NR	Microcephaly	NR	NR
63	Monies (2017) Hum Genet 136: 921	M	NR	c.1098dupC	p.I367fs	frame shift duplication	homozygous	NR	(+)	NR	NR	Brain atrophy	NR	NR
64	Alhakeem (2018) Brain Dev 40: 827	NR	1st day	c.1227_1228insC	p.(Ile410Hisfs*13)	frameshift insertion	homozygous	focal motor seizures and GTC	(+)	NR	NR	Posterior periventricular hyperintensity with reduction in the volume of white matter	EEG：Multifocal epileptiform discharges	TPM, CNZ CBZ, LEV, Stiripentol
65	Alhakeem (2018) Brain Dev 40: 827	NR	1st day	c.1227_1228insC	p.(Ile410Hisfs*13)	frameshift insertion	homozygous	focal motor seizures and GTC	(+)	NR	NR	Normal MRI	EEG：Focal left temporal discharges	TPM, CNZ CBZ, LEV, Stiripentol
66	Alhakeem (2018) Brain Dev 40: 827	NR	1st day	c.1227_1228insC	p.(Ile410Hisfs*13)	frameshift insertion	homozygous	focal motor seizures and GTC	(+)	NR	NR	Normal MRI	EEG：Many sharp wave and poly spikes in the left side	PB, CNZ, CBZ, LEV, Stiripentol
67	Fernández-Marmiesse A, Front Neurosci. 2019;13.	M	1st day	c.1511delT;c.1514C >T	p. L504Cfs*23, p.Pro505Leu	Frameshift and Missense	Compound heterozygous	NR	(+)	(+)	NR	NR	NR	NR
68	Nashabat M, Seizure. 2019;69:154-172.	F	2nd day	c.1227dupC	p.Ile410Hisfs*13	Duplication, frameshift, and premature stop	homozygous	GTC	(+)	NR	(+)	Microcephaly	EEG:Excessive beta activity, no epileptic discharges	3AEDs
69	Nashabat M, Seizure. 2019;69:154-172.	M	2nd day	c.655 G > A	p.Gly219Arg	Missense	homozygous	GTC	(+)	NR	NR	Arachnoid cyst in theright temporal lobe	EEG:consistent with Lennox Gastaut syndrome (LGS).	NR
70	Nashabat M, Seizure. 2019;69:154-172.	M	Neonatal	c.231 + 2T > G	NA	Intronic, splice site	homozygous	focal, GTC	(+)	NR	NR	Microcephaly	EEG: multifocal discharges	4AEDs
71	Nashabat M, Seizure. 2019;69:154-172.	F	Neonatal	c.785 T > C	p.Leu262Pro	Missense	homozygous	GTC	(+)	NR	NR	Normal MRI	EEG: multifocal discharges	＞3AEDs
72	Nashabat M, Seizure. 2019;69:154-172	M	Neonatal	c.1227dupC	p.Ile410Hisfs*13	Duplication, frameshift, and premature stop	homozygous	GTC	(+)	NR	NR	Normal MRI	EEG: multifocal discharges	3AEDs
73	Nashabat M, Seizure. 2019;69:154-172.	M	Neonatal	c.1227_1228insC	p.Ile410Hisfs*13	insertion, frameshift, and premature stop	homozygous	GTC	(+)	NR	NR	Normal MRI	EEG: multifocal discharges	3AEDs
74	Nashabat M, Seizure. 2019;69:154-172.	M	Neonatal	c.1227_1228insC	p.Ile410Hisfs*13	insertion, frameshift, and premature stop	homozygous	GTC	(+)	NR	NR	Normal MRI	EEG: multifocal discharges	3AEDs
75	Nashabat M, Seizure. 2019;69:154-172.	M	Neonatal	c.1227_1228insC	p.Ile410Hisfs*13	insertion, frameshift, and premature stop	homozygous	GTC	(+)	NR	NR	Normal MRI	EEG: multifocal discharges	＞3AEDs
76	Nashabat M, Seizure. 2019;69:154-172.	F	1y	c.785 T > C	p.Leu262Pro	Missense	homozygous	GTC	(+)	NR	NR	Normal MRI	EEG: multifocal discharges	3AEDs
77	Nashabat M, Seizure. 2019;69:154-172.	F	Neonatal	c.785 T > C	p.Leu262Pro	Missense	homozygous	focal, GTC	(+)	NR	NR	Normal MRI	EEG :Epileptic Encephalopathy	3AEDs
78	Nashabat M, Seizure. 2019;69:154-172.	F	Neonatal	c.1654 T > A	p.Phe552Ile	Missense	homozygous	focal, GTC	NR	NR	NR	Normal MRI	EEG :multifocal discharges	2AEDs
79	Quaio (2020) Am J Med Genet C Semin Med Genet 184: 955	F	NR	c.1514C>T	p.Pro505Leu	Missense	homozygous	NR	(+)	NR	NR	NR	NR	NRs
80	Yang (2020) Child Neurol Open 7: 2329048X20931361	M	NR	c.655G>A, c.1475T>C	p.G219R and p.Leu492Pro	Missense	Compound heterozygous	Focal motor with retained awareness, GTC	NR	(+)	(+)	NR	EEGs in the neonatal period consistently demonstrated status epilepticus, and a discontinuous background, followed by normalization of the background with diminished seizures but multifocal sharps persisting. Electroencephalographies outside of the neonatal period suggested a well-organized, mostly normal for age frequencies, even in the face of frequent seizures. The interictal spikes in these E…	AA, namenda, PB
81	Yang (2020) Child Neurol Open 7: 2329048X20931361	F	NR	c.655G>A, c.1475T>C	p.G219R and p.Leu492Pro	Missense	Compound heterozygous	Focal motor with retained awareness, unresponsive with abnormal motor, GTC, myoclonic	NR	(+)	(+)	NR		AA, DZP, felbatol, namenda, perampanel, sertraline
82	Yang (2020) Child Neurol Open 7: 2329048X20931361	F	NR	c644C>T	p.Ala215Val	Missense	Homozygous	GTC	NR	(+)	(+)	NR		PB, TPM, VPA
83	Yang (2020) Child Neurol Open 7: 2329048X20931361	M	NR	c644C>T	p.Ala215Val	Missense	Homozygous	Focal motor with retained awareness, GTC, tonic	NR	(+)	(+)	NR		CBZ, TPM
84	Yang (2020) Child Neurol Open 7: 2329048X20931361	F	NR	c.425C>T, 655G>A	p.Thr142Met and p.Gly219Arg	Missense	Compound heterozygous	GTC	NR	(+)	(+)	NR		No medications
85	Yang (2020) Child Neurol Open 7: 2329048X20931361	F	NR	c.425C>T, 655G>A	p.Thr142Met and p.Gly219Arg	Missense	Compound heterozygous	GTC	NR	(+)	(+)	NR		AA, CBZ, PB, stiripentol, bromides
86	Yang (2020) Child Neurol Open 7: 2329048X20931361	M	NR	c.425C>T, 655G>A	p.Thr142Met and p.Gly219Arg	Missense	Compound heterozygous	GTC, myoclonic	NR	(+)	(+)	NR		Vigabatrin
87	Yang (2020) Child Neurol Open 7: 2329048X20931361	F	NR	c.511 delG	P.E171Sfs* 16	Frame shift due to single nucleotide deletion.	homozygous	GTC	NR	(+)	(+)	NR		AA, DZP
88	Yang (2020) Child Neurol Open 7: 2329048X20931361	M	NR	c.511 delG	P.E171Sfs* 16	Frame shift due to single nucleotide deletion.	homozygous	GTC	NR	(+)	(+)	NR		AA, DZP, lacosamide
89	Yang (2020) Child Neurol Open 7: 2329048X20931361	M	NR	c.148T>C	p.Cys50Arg	Missense	homozygous	Focal motor with retained awareness, Unresponsive with abnormal motor	NR	(+)	(+)	NR		LEV, VPA, PB
90	Yang (2020) Child Neurol Open 7: 2329048X20931361	F	NR	c.148T>C	p.Cys50Arg	Missense	homozygous	GTC	NR	(+)	(+)	NR		Lacosamide
91	Yang (2020) Child Neurol Open 7: 2329048X20931361	F	NR	c.425C>T	p.Thr142 Met	Deletion of the entire gene	Compound heterozygous	GTC, myoclonic	NR	(+)	(+)	NR		LEV
92	Yang (2020) Child Neurol Open 7: 2329048X20931361	F	NR	c.1022G>A, c.655G>A	p.Trp341* and p.Gly219Arg	Deletion and missense	Compound heterozygous	GTC, tonic, myoclonic	NR	(+)	(+)	NR		AA, CBZ, CLB, DZP, VPA
93	Yang (2020) Child Neurol Open 7: 2329048X20931361	F	NR	c.425C>T	p.Thr142Met	Deletion of the entire gene	Compound heterozygous	GTC	NR	(+)	(+)	NR		LEV, PB, VPA
94	Yang (2020) Child Neurol Open 7: 2329048X20931361	M	NR	c.997C>T, c.680 C>T	P.Arg333*, P.Thr227Met	Nonsense truncated protein and missense	Compound heterozygous	GTC, myoclonic	NR	(+)	(+)	NR		AA, CBZ, OXC, PB
95	Yang (2020) Child Neurol Open 7: 2329048X20931361	M	NR	c.655 G>A	P.Gly219Arg	Deletion exon 1 to 5	Compound heterozygous	GTC	NR	(+)	(+)	NR		VPA
96	Yang (2020) Child Neurol Open 7: 2329048X20931361	M	NR	c.231+2T>G		Splice Site	homozygous	GTC, tonic, infantile spasms,	NR	(+)	(+)	NR		CNZ
97	Yang (2020) Child Neurol Open 7: 2329048X20931361	M	NR	NR	NR	NR	NR	Unresponsive with abnormal motor, GTC	NR	(+)	(+)	NR		Lacosamide, VPA
98	Yang (2020) Child Neurol Open 7: 2329048X20931361	M	NR	c.997C>T and c.478G>T	p.Arg333* and p.Glu160*	Nonsence	Compound heterozygous	Unresponsive with abnormal motor, GTC	NR	(+)	(+)	NR		CLB, TPM, VPA
99	Yang (2020) Child Neurol Open 7: 2329048X20931361	M	NR	c.997C>T and c.478G>T	p.Arg333* and p.Glu160*	Nonsence	Compound heterozygous	Unresponsive with abnormal motor, GTC	NR	(+)	(+)	NR		DZP, LEV, PB
100	Yang (2020) Child Neurol Open 7: 2329048X20931361	F	NR	c680 C>T	p.Thr227Met	Missence	homozygous	Absence, unresponsive with abnormal motor	NR	(+)	(+)	NR		Gabapentin, LTG, LP, LEV, PB
101	Yang (2020) Child Neurol Open 7: 2329048X20931361	F	NR	C.103-1 G>A, C.1276-1		Splice Site	Compound heterozygous	Absence, GTC, myoclonic	NR	(+)	(+)	NR		AA, lacosamide, LTG, TPM, VPA
102	Yang (2020) Child Neurol Open 7: 2329048X20931361	F	NR	c.389G>A, Gene deletion exon 2 to 4	p.Gly130Asp, Gene deletion exon 2 to 4	Missense, Deletion	Compound heterozygous	Absence, unresponsive with abnormal motor, GTC, tonic	NR	(+)	(+)	NR		DZP, zarontin, PB, rufinamide
103	Maddirevula (2020) Genome Biol 21: 145	NR	NR	c.231+2T>G	p.Phe35_Gln77del	Canonical splicing - Frameshift indel	Homozygous	NR	NR	NR	NR	NR	NR	NR
104	Matricardi (2020) Epilepsia 61: 2474	M	2nd day	c.655G>A, c.1421C>T	p.Gly219Arg, p.Pro474Leu	Missense	Compound heterozygous	Focal motor, focal to bilateral clonic	(+)	(+)	(+)	Normal (n=13), abnormal (n=1) PWML (n=1) (resolved on follow up)	EEG recordings at onset showed slow background activity in three patients (21%). Epileptiform abnormalities were detected in 10 patients (72%), including focal (40%), multifocal（ 50%), and diffuse（20%）	DZP, PB, PIN, PHT
105	Matricardi (2020) Epilepsia 61: 2474	M	2nd day	c.655G>A, del exons 1-5	p.Gly219Arg, del exons 1-5	Missense, Deletion	Compound heterozygous	Focal motor, tonic	(+)	NR	(+)			PB
106	Matricardi (2020) Epilepsia 61: 2474	F	1st day	c.680C>T, c.1570G>C	p.Thr227Met, p.Asp524His	Missense	Compound heterozygous	Focal motor, focal to bilateral clonic	(+)	NR	(+)			PB
107	Matricardi (2020) Epilepsia 61: 2474	M	1st day	c.655G>A, c.1280C>T	p.Gly219Arg, p.Ser427Leu	Missense	Compound heterozygous	Focal motor, focal to bilateral clonic	(+)	NR	(+)			PB, PHT, PIN, LEV, LIDO
108	Matricardi (2020) Epilepsia 61: 2474	F	1st day	c.655G>A, c.943G>A	p.Gly219Arg, p.Ala315Thr	Missense	Compound heterozygous	Focal motor, focal to bilateral clonic	(-)	NR	(-)			PB
109	Matricardi (2020) Epilepsia 61: 2474	F	1st day	c.655G>A, c.943G>A	p.Gly219Arg, p.Ala315Thr	Missense	Compound heterozygous	Focal motor, focal to bilateral clonic	(-)	NR	(-）			PB
110	Matricardi (2020) Epilepsia 61: 2474	F	1st day	c.997C>T	p.Arg333*	Nonsense, Stop codon	homozygous	Focal to bilateral tonic	(+)	(+)	(+）			PB, PHT, PIN
111	Matricardi (2020) Epilepsia 61: 2474	F	1st day	c.997C>T	p.Arg333*	Nonsense, Stop codon	homozygous	Focal to bilateral tonic	(+)	(+)	(+）			PB, PHT, PIN
112	Matricardi (2020) Epilepsia 61: 2474	M	1st day	c.425C>T	p.Thr142Met	Missense	homozygous	Focal motor, focal to bilateral clonic	(+)	(+)	(+）			PB, MDZ, PHT, LEV
113	Matricardi (2020) Epilepsia 61: 2474	F	2nd day	c.425C>T	p.Thr142Met	Missense	homozygous	Focal motor, focal to bilateral clonic	(+)	NR	(+）			PB
114	Matricardi (2020) Epilepsia 61: 2474	F	2nd day	c.1475T>C	p.Leu492Pro	Missense	homozygous	Focal to bilateral tonic	(+)	NR	(+）			PB
115	Matricardi (2020) Epilepsia 61: 2474	F	1st day	c.1022G>A, c.1207_1217dup11	p.Trp341*, p.Pro407Argfs*12	Nonsense, Stop codon, FrameshiftDuplication	Compound heterozygous	Focal motor, clonic（ alternating side)	(+)	NR	(+）			PB, PHT
116	Matricardi (2020) Epilepsia 61: 2474	M	1st day	c.1022G>A, c.1207_1217dup11	p.Trp341*, p.Pro407Argfs*12	Nonsense, Stop codon, FrameshiftDuplication	Compound heterozygous	Focal motor, clonic（ alternating side)	(+)	NR	(+）			PB, PHT
117	Matricardi (2020) Epilepsia 61: 2474	M	1st day	c.369-2A>G		Splice Site	homozygous	Focal motor, focal to bilateral clonic	(+)	(+)	(+）			PB, PHT, pyridoxal phosphate, folinic acid
118	Kopel (2020) Psychiatr Genet 31: 32	F	1st day	c.1280 C>T	p.Ser427Leu	Missence	homozygous	NR	(+)	NR	(+）	NR	NR	Metformin, VPA
119	Turro (2020) Nature 583, 96	NR	NR	c.1451delG, c.332T>G	p.Gly484AlafsTer13, p.Leu111Arg	Frameshift deletion, Missense	Compound heterozygous	NR	(+)	NR	NR	NR	NR	NR
120	Jiang (2021) Front Mol Neurosci 14, 699574	M	14d	c.202C>T, c.429_c.437 delGCCGTGGTT	p.Pro68Ser, p.A143_A146 delinsA	Missense, Non-frameshift deletion	Compound heterozygous	FOS	(+)	NR	(+)	Normal MRI	EEG: Focal spike wave	NR
121	Mir (2021) Hum Genet 141: 81	F	40d	c.1654T>A	p. Phe552lle	Missence	homozygous	Right focal tonic, generalized tonic, and generalized tonic–clonic	(+)	(+)	(+)	Periventricular leukomalacia(PVL)	EEG:Multi focal spikes, normal background	NR
122	Sallevelt (2021) Genet Med 23, 1125	M	Early infantile	c.1056-1G>A		Splice Site	homozygous	NR	NR	NR	NR	NR	NR	NR
123	Duan (2021) Am J Med Genet A 185, 1972	M	Shortly after birth	88.5 Kb novel homozygous deletion involving SLC13A5 and XAF1(Chr17p13.1)				generalized clonic seizures	(+)	(+)	(-)	Normal MRI	NR	PB, LEV, PHT, CNZ, CBZ
124	Duan (2021) Am J Med Genet A 185, 1972	M	At birth	88.5 Kb novel homozygous deletion involving SLC13A5 and XAF1				generalized clonic seizures	(+)	(+)	(+)	NR	NR	CBZ
125	Duan (2021) Am J Med Genet A 185, 1972	M	3rd day	88.5 Kb novel homozygous deletion involving SLC13A5 and XAF1				generalized clonic seizures	(+)	(+)	(+)	NR	NR	PB, CBZ
126	Pellegrino(2021)Seizure.91:244-245	M	1st day	c.997C>T	p.Arg333*	Nonsense	homozygous	GTC	(-)	(+)	(-)	Sign of bilateral cortex reduced myelination	EEG(onset): diffuse, multifocal anomalies in a dysrhythmic background	PB, CNZ, PIN, VAP, AA
127	Zhou JIngYI, Journal of Epilespsy, Nov.2021, Vol.7, No.6	M	1st day	c.1280C>T, c.680＞T	p.Ser427Leu, p.Thr227Met	Missense	Compound heterozygous	ocal clonic,	(+)	(+)	NR	Normal MRI	EEG:focal discharges and the discharges were not fixed	PIN
128	Brown, Metabolites.2021 Oct 29;11(11):746	F	NR	c.1599C > A, c.650G > A	p.Asn533Lys, p.Ser217Asn	Missense	Compound heterozygous	NR	NR	NR	NR	NR	NR	NR
129	Brown, Metabolites.2021 Oct 29;11(11):746	F	NR	c.655G > A, c.245A > G	p.Gly219Arg, p.Tyr82Cys	Missense	Compound heterozygous	NR	NR	NR	NR	NR	NR	NR
130	Brown, Metabolites.2021 Oct 29;11(11):746	F	NR	c.511delG	p.Glu171Serfs*16	frameshift	homozygous	NR	NR	NR	NR	NR	NR	NR
131	Brown, Metabolites.2021 Oct 29;11(11):746	F	NR	c.368 + 1G > A		Splice Site	homozygous	NR	NR	NR	NR	NR	NR	NR
132	Brown, Metabolites.2021 Oct 29;11(11):746	F	NR	c.368 + 1G > A		Splice Site	homozygous	NR	NR	NR	NR	NR	NR	NR
133	Brown, Metabolites.2021 Oct 29;11(11):746	F	NR	c.1475T > C, c.655G > A	p.Leu492Pro, p.Gly219Arg	Missense	Compound heterozygous	NR	NR	NR	NR	NR	NR	NR
134	Brown, Metabolites.2021 Oct 29;11(11):746	F	NR	Gene Deletion, c.425C > T	p.Thr142Met	gene deletion, Missense	Compound heterozygous	NR	NR	NR	NR	NR	NR	NR
135	Brown, Metabolites.2021 Oct 29;11(11):746	F	NR	chr17:6606, 915-6611, 132 × 1, c.389G > A	p.Gly130Asp	partial gene deletion, Missense	Compound heterozygous	NR	NR	NR	NR	NR	NR	NR
136	Brown, Metabolites.2021 Oct 29;11(11):746	M	NR	c.997C>T	p.Arg333Ter	Missense	homozygous	NR	NR	NR	NR	NR	NR	NR
137	Brown, Metabolites.2021 Oct 29;11(11):746	M	NR	c.232-2A > G, c.1460C > T	p.Pro487Leu	splice site, Missense	Compound heterozygous	NR	NR	NR	NR	NR	NR	NR
138	Brown, Metabolites.2021 Oct 29;11(11):746	M	NR	c.1511delT	p.Leu504Cysfs*23	frameshift	homozygous	NR	NR	NR	NR	NR	NR	NR
139	Brown, Metabolites.2021 Oct 29;11(11):746	M	NR	c.511delG	p.Glu171Serfs*16	frameshift	homozygous	NR	NR	NR	NR	NR	NR	NR
140	Brown, Metabolites.2021 Oct 29;11(11):746	M	NR	c.655G > A, c.1475T > C	p.Gly219Arg, p.Leu492Pro	Missense	Compound heterozygous	NR	NR	NR	NR	NR	NR	NR
141	Brown, Metabolites.2021 Oct 29;11(11):746	M	NR	c.1514C > T, c.997C > T	p.Pro505Leu, p.Arg333Ter	Missense	Compound heterozygous	NR	NR	NR	NR	NR	NR	NR
142	Brown, Metabolites.2021 Oct 29;11(11):746	M	NR	c.655G > A, c.245A > G	p.Gly219Arg, p.Tyr82Cys	Missense	Compound heterozygous	NR	NR	NR	NR	NR	NR	NR
143	Santalucia, Ann Clin Transl Neurol, 2022 Jul;9(7):1095-1099	F	1st day	c.1496C>T	p.Ser499Phe	Missense	homozygous	focal clonic, , status epilepticus	(+)	(+)	a delayed tooth eruption	Normal MRI	EEG:a completely disrupted background activity with absent sleep and wake cycles, replaced by a burst‐suppression (B‐S) pattern	PB, PIN+folic acid-CBZ(Good effect)-DZP(status epilepticus)
144	AlQudairy H, Front Pediatr. 2023 Feb 27;10:1051534.	F	1st day	c.1227dupC	p.Ile410Hisfs*13	Frameshift duplication	homozygous	mainly described in the form of eye fluttering	(+)	(+)	(+)	Microcephaly	EEG was done at the age 8 and 14 showed intermittent slow activity, maximum in the left temporal with an ecessive fast activity that could be due phenobarbital ; a chronic medication the patient is taking	LEV, PB, TPM（No seizures for more than 2 years）
145	AlQudairy H, Front Pediatr. 2023 Feb 27;10:1051534.	F	1st day	c.1227dupC	p.Ile410Hisfs*13	Frameshift duplication	homozygous	Multiple semiologies	(+)	(+)	(+)	Normal MRI	EEG showed abnormalities probably due to medication effect	PB, TPM
146	AlQudairy H, Front Pediatr. 2023 Feb 27;10:1051534.	F	2nd day	c.1227dupC	p.Ile410Hisfs*13	Frameshift duplication	homozygous	focal clonic, generalized tonic-clonic	(+)	(+)	(+)	Normal MRI	EEG was done at the age of 9 months which showed diffuse eccephalopathy that might be due to medications or postical status, others EEGs at the age of 2 and 3 years all were normal. The last EEG at age of 6 years was abnormal and suggestive of focal epileptogenicity from the left occipitotemporal head region	PB, LEV, CBZ, VPA, TPM, CLB
147	AlQudairy H, Front Pediatr. 2023 Feb 27;10:1051534.	F	2nd day	c.1437+5G>A		Splice Site	homozygous	NR	(+)	(+)	(+)	Normal MRI	EEG in second day of life after her first seizure showed epileptiform discharges, now her seizure is controlled on Valporic acid with last EEG is normal.	VPA
148	AlQudairy H, Front Pediatr. 2023 Feb 27;10:1051534.	F	Neonate	c.1437+5G>A		Splice Site	homozygous	Focal seizure and myoclonic attacks	(+)	(+)	(+)	Microcephaly, Focal cortical dysplasia, minimal cortical thickening in the frontal lobe	First EEG at age of 4 years was suggestive of mild cortical dysfunction and nonspecific encephalopathy. Another EEG was done at age of 11 years old was suggestive of mild cortical dysfunction and nonspecific encephalopathy. Her last EEG at age of 13 yaers was normal.was normal	multiple AEDs
149	AlQudairy H, Front Pediatr. 2023 Feb 27;10:1051534.	F	1st day	c.1437+5G>A		Splice Site	homozygous	NR	(+)	(-)	(+)	Normal MRI	EEG was severely abnormal with multiple cortical neuro irritability indicating predisposition for epileptic seizures at the age of 40 days,	NR
150	Whitney, Seizure, 2023 Mar:106:8-13	M	1st day	c.202C>T, c.655G>A,	p.Pro68Ser, p. Gly219Arg	NR	Compound heterozygous	multifocal seizures	NR	(+)	(+)	PWML	EEG:multifocal electrographic seizures, discontinuity, and multifocal interictal epileptiform discharges.	CLB, TPM, LEV, PB, Lacosamide
151	Mohammad, Acta Neurol Belg, 2024 Dec;124(6):1959-1972	M	Neonate	c.1437+1G>T		splice Site	homozygous	focal clonic	(+)	(+)	(-)	extensive persistent hypomyelination, frontoparietal white matter loss,	EEG:bilateral paroxysmal epileptiform discharges at the age of 18 months	PB, LTG, TPM
152	Mohammad, Acta Neurol Belg, 2024 Dec;124(6):1959-1972	F	Neonate	c.1437+1G>T		splice Site	homozygous	GTC	(+)	(+)	(-)	displayed more pronounced white matter loss in the frontoparietal region, with no evidence of delayed myelination	EEG:bilateral paroxysmal epileptiform discharges at the age of 18 months	PB, LTG, PHT
153	Saifullah, Cureus.2024 Nov 25;16(11):e74405	F	1st day	c.655G>A	p.Gly219Arg	missense	homozygous	focal clonic	NR	NR	NR	mild hypoxic changes in the bilateral frontoparietal area	EEG:frontal and parietal lobe bilateral hemispheres discharge, background voltage remains normal. Normal interictal EEG	LEV, PB, VPA, PHT, TPM, OXC, PIN
154	Alsemari, PediatrNeurol.2024 Feb:151:68-72.	M	Neonate	c.291_296dupCGTGGC	p.Ala99_Val1100dup	Duplication	homozygous	focal clonic	(+)	(+)	(+)	brain volume loss and nonspecific signal abnormality of the bilateral hemispheric white matter	EEG: epilepticdischarges over the left anterior frontal lobes.	multiple AEDs
155	Alsemari, PediatrNeurol.2024 Feb:151:68-72.	M	Neonate	c.231+2T>G		splice site	homozygous	GTC	(+)	NR	(+)	MRI normal	EEG: multifocal spikes	multiple AEDs
156	Alsemari, PediatrNeurol.2024 Feb:151:68-72.	F	Neonate	c.691dupG	p.Val231Glyfs*13	Duplication, frameshift, and premature stop	homozygous	GTC	(+)	(+)	(+)	persistent right posteroinferior cortical cerebellar T2/fluid-attenuated inversion recovery hyperintensitywith no associated diffusion restriction	EEG: nonspecific cerebral dysfunction, suggestive of encephalopathy.	multiple AEDs
157	Alsemari, PediatrNeurol.2024 Feb:151:68-72.	F	NR	c.1227dupC	p. lle410Hisfs*13	Duplication, frameshift, and premature stop	homozygous	intractable seizures	(+)	NR	(+)	mild thinning of the corpus callosum, and patchy relatively symmetric T2/fluid-attenuated inversion recovery-hyperintense signal is noted in the bilateral hemispheric white matter	EEG: spikes over the left occipitotemporal region	multiple AEDs
158	Ozlu C(2024), Dev Med Child Neurol Dec 22.	NR	NR	c.1475T>C, c.655G>A	p.L492P, p.G219R	missense	compound heterozygous	NR	NR	NR	NR	NR	NR	NR
159	Ozlu C(2024), Dev Med Child Neurol Dec 22.	NR	NR	c.1475T>C, c.655G>A	p.L492P, p.G219R	missense	compound heterozygous	NR	NR	NR	NR	NR	NR	NR
160	Ozlu C(2024), Dev Med Child Neurol Dec 22.	NR	NR	c.997C>T, c.1514C>T	p.R333*, p.P505L	nonsense, missense	compound heterozygous	NR	NR	NR	NR	NR	NR	NR
161	Ozlu C(2024), Dev Med Child Neurol Dec 22.	NR	NR	c.511delG	p.Glu171Sfs*16	frameshift	homozygous	NR	NR	NR	NR	NR	NR	NR
162	Ozlu C(2024), Dev Med Child Neurol Dec 22.	NR	NR	c.511delG	p.Glu171Sfs*16	frameshift	homozygous	NR	NR	NR	NR	NR	NR	NR
163	Ozlu C(2024), Dev Med Child Neurol Dec 22.	NR	NR	c.232-2A>G, c.1460C>T	p.P487L	splice site, missense	compound heterozygous	NR	NR	NR	NR	NR	NR	NR
164	Ozlu C(2024), Dev Med Child Neurol Dec 22.	NR	NR	c.245A>G, c.655G>A	p.Y82C, p.G219R	missense	compound heterozygous	NR	NR	NR	NR	NR	NR	NR
165	Ozlu C(2024), Dev Med Child Neurol Dec 22.	NR	NR	c.245A>G, c.655G>A	p.Y82C, p.G219R	missense	compound heterozygous	NR	NR	NR	NR	NR	NR	NR
166	Ozlu C(2024), Dev Med Child Neurol Dec 22.	NR	NR	c.1511delT	p.L504Cfs*23	frameshift	homozygous	NR	NR	NR	NR	NR	NR	NR
167	Ozlu C(2024), Dev Med Child Neurol Dec 22.	NR	NR	Deletion (complete), c.425C>T	p.T142M	missense	compound heterozygous	NR	NR	NR	NR	NR	NR	NR
168	Ozlu C(2024), Dev Med Child Neurol Dec 22.	NR	NR	Deletion (partial) exon 2–4, c.389G>A	p.G130D	missense	compound heterozygous	NR	NR	NR	NR	NR	NR	NR
169	Ozlu C(2024), Dev Med Child Neurol Dec 22.	NR	NR	c.655G>A	p.G219R	missense	homozygous	NR	NR	NR	NR	NR	NR	NR
170	Ozlu C(2024), Dev Med Child Neurol Dec 22.	NR	NR	c.1190delT, c.655G>A	p.L397Rfs*5, p.G219R	frameshift, missense	compound heterozygous	NR	NR	NR	NR	NR	NR	NR
171	Ozlu C(2024), Dev Med Child Neurol Dec 22.	NR	NR	c.1022G>A, c.655G>A	p.W341*, p.G219R	nonsense, missense	compound heterozygous	NR	NR	NR	NR	NR	NR	NR
172	Ozlu C(2024), Dev Med Child Neurol Dec 22.	NR	NR	c.1022G>A, c.1217_1218dup11	p.W341*p.P407Rfs*12	nonsense, frameshift	compound heterozygous	NR	NR	NR	NR	NR	NR	NR
173	Ozlu C(2024), Dev Med Child Neurol Dec 22.	NR	NR	c.997C>T, c.478G>T	p.R333*, p.E160*	nonsense	compound heterozygous	NR	NR	NR	NR	NR	NR	NR
174	Ozlu C(2024), Dev Med Child Neurol Dec 22.	NR	NR	c.655G>A	p.G219R	missense	homozygous	NR	NR	NR	NR	NR	NR	NR
175	Ozlu C(2024), Dev Med Child Neurol Dec 22.	NR	NR	c.424C>T, c.655G>A	p.T142M, p.G219R	missense	compound heterozygous	NR	NR	NR	NR	NR	NR	NR
176	Ozlu C(2024), Dev Med Child Neurol Dec 22.	NR	NR	c.424C>T, c.655G>A	p.T142M, p.G219R	missense	compound heterozygous	NR	NR	NR	NR	NR	NR	NR
177	Ozlu C(2024), Dev Med Child Neurol Dec 22.	NR	NR	c.424C>T, c.655G>A	p.T142M, p.G219R	missense	compound heterozygous	NR	NR	NR	NR	NR	NR	NR
178	Ozlu C(2024), Dev Med Child Neurol Dec 22.	NR	NR	c.1514C>T	p.P505L	missense	homozygous	NR	NR	NR	NR	NR	NR	NR
179	Ozlu C(2024), Dev Med Child Neurol Dec 22.	NR	NR	c.655G>A	p.G219R	missense	homozygous	NR	NR	NR	NR	NR	NR	NR
180	Ozlu C(2024), Dev Med Child Neurol Dec 22.	NR	NR	c.202C>T, c.655G>A	p.P68S, p.G219R	missense	compound heterozygous	NR	NR	NR	NR	NR	NR	NR
181	Ozlu C(2024), Dev Med Child Neurol Dec 22.	NR	NR	c.655G>A	p.G219R	missense	homozygous	NR	NR	NR	NR	NR	NR	NR
182	Ozlu C(2024), Dev Med Child Neurol Dec 22.	NR	NR	c.997C>T, c.1249G>A	p.R333*, p.G417R	nonsense, missense	compound heterozygous	NR	NR	NR	NR	NR	NR	NR
183	Ozlu C(2024), Dev Med Child Neurol Dec 22.	NR	NR	c.1207_1217dup	p.P407Rfs*12	frameshift	homozygous	NR	NR	NR	NR	NR	NR	NR
NR: Not report; *: stop codon; M: male; F: female; GTC: Generalized tonic-clonic; PWWL: Punctate White Matter Lesions AEDs: antiepileptic drugs: MDZ: midazolam; CBZ: carbamazepine; CLB: clobazam; CNZ: clonazepam; HC: hydrocortisone; KD: ketogenic diet; LEV: levetiracetam; LTG: amotrigine; NTZ: nitrazepam; OXC: oxcarbazepine; PB: phenobarbital; PHT: phenytoin; TPM: topiramate; VGB: vigabatrin; VPA…
